# Supplementary material
Source: PubMed Central journal article supplement (PMC8525217)
Supplement: NIHMS1663578-supplement-Supplementary___Appendix__online_only_material__etc__.pdf [file NIHMS1663578-supplement-Supplementary___Appendix__online_only_material__etc__.pdf]

**Table S2. Clinical Outcomes at 2-weeks Post-arthroplasty within CYP2D6 PM/IMs and NMs**

|                                                                                                                                                                                                                                                                     | CYP2D6-guided              | Usual Care                 | P values |
|---------------------------------------------------------------------------------------------------------------------------------------------------------------------------------------------------------------------------------------------------------------------|----------------------------|----------------------------|----------|
| <b>MME Consumption</b>                                                                                                                                                                                                                                              |                            |                            |          |
| PM/IM                                                                                                                                                                                                                                                               | 220 mg [104-336]<br>(n=29) | 275 mg [163-335]<br>(n=23) | 0.338    |
| NM                                                                                                                                                                                                                                                                  | 186 mg [104-269]<br>(n=96) | 225 mg [120-350]<br>(n=41) | 0.174    |
| NM/UM                                                                                                                                                                                                                                                               | -                          | 160 mg [125-310]<br>(n=3)  | -        |
| <b>Composite Pain Intensity</b>                                                                                                                                                                                                                                     |                            |                            |          |
| PM/IM                                                                                                                                                                                                                                                               | 2.5 ± 0.8<br>(n=30)        | 2.5 ± 0.5<br>(n=25)        | 0.800    |
| NM                                                                                                                                                                                                                                                                  | 2.6 ± 0.8<br>(n=106)       | 2.6 ± 0.8<br>(n=45)        | 0.972    |
| NM/UM                                                                                                                                                                                                                                                               | -                          | 2.3 ± 1.5<br>(n=3)         | -        |
| MME: morphine milligram equivalents; Values displayed as median [interquartile range] or mean ± SD. Composite pain intensity was defined as the mean of current pain, and worst and average pain over the past seven days, each assessed on a 5-point Likert scale. |                            |                            |          |

**Table S3. Clinical Outcomes at 1-week Post-arthroplasty**

|                                 | <b>CYP2D6-guided</b>        | <b>Usual Care</b>           | <b>P values</b> |
|---------------------------------|-----------------------------|-----------------------------|-----------------|
| <b>MME Consumption</b>          | 95 mg [55 – 168]<br>(n=111) | 125 mg [75 – 200]<br>(n=57) | 0.073           |
| <b>Composite Pain Intensity</b> | 2.9 ± 0.9<br>(n=133)        | 2.9 ± 0.7<br>(n=67)         | 0.943           |

MME: morphine milligram equivalents; Values displayed as median [interquartile range] or mean ± SD. Composite pain intensity was defined as the mean of current pain, and worst and average pain over the past seven days, each assessed on a 5-point Likert scale.

**Table S5. HOOS-JR and KOOS-JR Interval Scores at 2-weeks Post-arthroplasty**

|                     | <b>CYP2D6-guided</b>      | <b>Usual Care</b>         | <b>P values</b> |
|---------------------|---------------------------|---------------------------|-----------------|
| <b>HOOS (n=82)</b>  |                           |                           |                 |
| <b>Mean ± SD</b>    | <b>69 ± 17<br/>(n=54)</b> | <b>69 ± 16<br/>(n=28)</b> | <b>0.997</b>    |
| PM/IM               | 68 ± 16<br>(n=12)         | 64 ± 9<br>(n=6)           | 0.621           |
| NM                  | 70 ± 18<br>(n=41)         | 69 ± 17<br>(n=21)         | 0.846           |
| NM/UM               | -                         | 100<br>(n=1)              | -               |
| <b>KOOS (n=111)</b> |                           |                           |                 |
| <b>Mean ± SD</b>    | <b>59 ± 15<br/>(n=74)</b> | <b>62 ± 12<br/>(n=37)</b> | <b>0.455</b>    |
| PM/IM               | 55 ± 15<br>(n=16)         | 62 ± 12<br>(n=16)         | 0.163           |
| NM                  | 61 ± 15<br>(n=58)         | 62 ± 12<br>(n=19)         | 0.681           |
| NM/UM               | -                         | 53 ± 19<br>(n=2)          | -               |

Values displayed as mean ± SD. The HOOS-JR and KOOS-JR interval scores range from 0 to 100 where 0 represents total hip or knee disability and 100 represents perfect hip or knee health.
